# Supplementary material
Source: Springer Nature journal article supplement (https://www.springermedizin.de/resource/supplementary/12943_2010_792_MOESM5_ESM.pdf/9554840)

DMSO

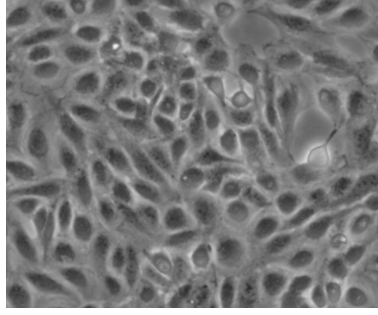

B

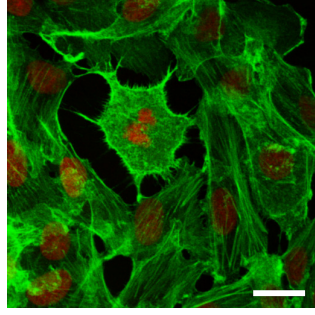

RPI-1

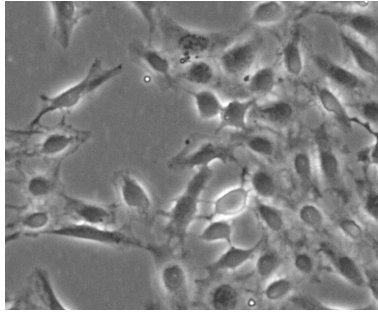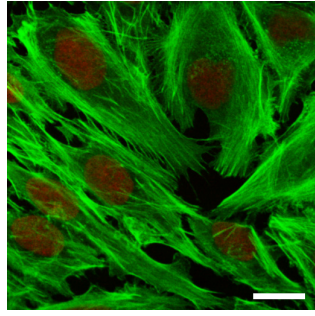

Dasatinib

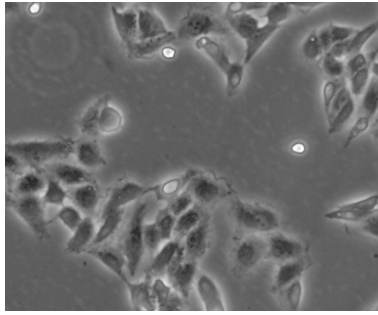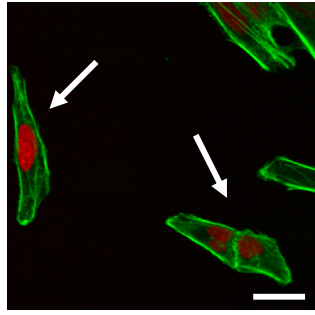

RPI-1 +  
Dasatinib

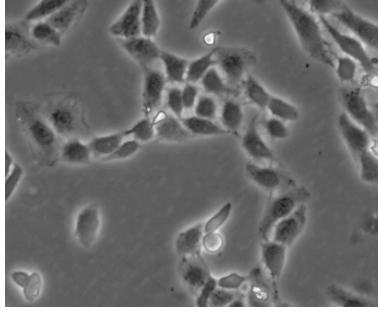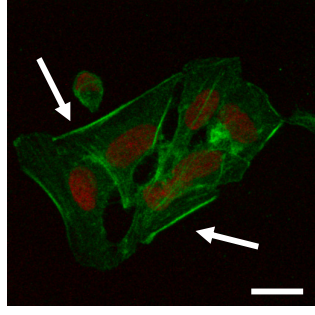

Supplement: MOESM5 [file 9554840]
